# Supplementary material for: Risk of infective endocarditis in patients with mitral valve prolapse: Systematic review with meta-analysis
Source: PubMed Central journal article supplement (PMC11582404; doi:10.1016/j.heliyon.2024.e39893), 2024-11-04
Supplement: mmc1.pdf [file mmc1.pdf]

# Supplementary material

**Risk of Infective Endocarditis in patients with Mitral Valve Prolapse: Systematic review with meta-analysis**

## Table of contents

|                                                                                       |   |
|---------------------------------------------------------------------------------------|---|
| Supplementary material 1 - Databases and search strategies.....                       | 3 |
| Supplementary material 2 – Main characteristics of the included case-control studies. | 4 |
| Supplementary material 3 - Main characteristics of the included cohort studies.....   | 5 |
| Supplementary material 4 – Risk of Bias assessment .....                              | 6 |
| Supplementary material 5 – Forest plot for NOS subgroups .....                        | 7 |
| Supplementary material 6 – Forest plot for study design subgroups.....                | 8 |
| Supplementary material 7 – Sensitivity analysis .....                                 | 9 |
| Supplementary material 8 - Publication bias .....                                     | 9 |

## **Supplementary material 1 - Databases and search strategies**

EBM Reviews - **Cochrane Central Register of Controlled Trials January 2022**, Ovid MEDLINE(R) and Epub Ahead of Print, In-Process, In-Data-Review & Other Non-Indexed Citations, Daily and Versions(R) 1946 to February 14, 2022

| # | Searches                      |
|---|-------------------------------|
| 1 | exp mitral valve<br>prolapse/ |
| 2 | (mitral adj4 prolapse).af.    |
| 3 | (mitral adj4 floppy).af.      |
| 4 | mitral<br>AJD4 myxomatous.af. |
| 5 | 1 or 2 or 3 or 4              |
| 6 | endocarditis.af.              |
| 7 | exp endocarditis/             |
| 8 | 6 or 7                        |
| 9 | 5 and 8                       |

### **Web of Science Core Collection**

Mitral (all fields) and prolapse (all fields) and endocarditis

### **SciELO Citation Index**

Mitral (topic) and prolapse (topic) and endocarditis (topic)

## Supplementary material 2 – Main characteristics of the included case-control studies

| Author, year          | Cases demographic data                                                        | Cases characteristics                              | IE criteria                                                                                                                                                                                                                                                                                                                                                                                                                         | Confounding factors for IE                                                                                                                                                                  | Control selection                                                                                | MVP criteria                                                                                                |
|-----------------------|-------------------------------------------------------------------------------|----------------------------------------------------|-------------------------------------------------------------------------------------------------------------------------------------------------------------------------------------------------------------------------------------------------------------------------------------------------------------------------------------------------------------------------------------------------------------------------------------|---------------------------------------------------------------------------------------------------------------------------------------------------------------------------------------------|--------------------------------------------------------------------------------------------------|-------------------------------------------------------------------------------------------------------------|
| <b>Clemens, 1982</b>  | Yale – New Haven Hospital (November 1976 – November 1980)                     | 32 men, 41 women<br>Mean age: 47 ± 18 years        | <ul style="list-style-type: none"> <li>Pathological documentation</li> <li>Clinical criteria (heart murmur + 2 positive blood cultures + peripheral stigmata / laboratory evidence)</li> </ul>                                                                                                                                                                                                                                      | <ul style="list-style-type: none"> <li>Exclusion of patients with HD antecedents</li> <li>No exclusion of patients with previous dental work</li> <li>Posterior analysis of IDUs</li> </ul> | Adult inpatients undergoing echocardiography                                                     | Systolic leaflet displacement ≥2mm                                                                          |
| <b>Danchin, 1989</b>  | CHRU de Nancy – Brabois (January 1981 – January 1986)                         | 33 men, 14 women<br>Mean age: 55.0 years           | <ul style="list-style-type: none"> <li>Pathological documentation</li> <li>Fever + 2 major clinical criteria</li> <li>Fever + 1 major + 3 minor clinical criteria</li> </ul> <p>(major criteria: 2 positive blood cultures, new heart murmur, vegetation on echocardiography; minor criteria: arterial embolism, immunologic disorders, splenomegaly, regurgitation murmur, clinical signs of vasculitis, CHF, pre-existing HD)</p> | No exclusion of patients with HD antecedents, patients with previous dental work or IDUs                                                                                                    | Subjects < 60 years undergoing routine echo + patients admitted for surgery of the limb          | Abnormal arc of one / both mitral leaflets above the level of the mitral valve annulus into the left atrium |
| <b>Devereux, 1986</b> | New York Hospital – Cornell Medical Center (November 1978 – December 1982)    | 49 men, 18 women<br>Mean age: 38 ± 14 years        | <ul style="list-style-type: none"> <li>Positive blood cultures</li> </ul> <p>(one patient only had clinical criteria – fever, arthralgias, rash, anemia, hematuria, elevated ESR)</p>                                                                                                                                                                                                                                               | No exclusion of patients with previous dental work<br>Posterior analysis of patients with HD antecedents or IDUs                                                                            | Randomly selected subjects + Patients undergoing echocardiography + Unselected subjects with MVP | Systolic leaflet displacement ≥2mm                                                                          |
| <b>Hickey, 1985</b>   | Prince Henry and Prince of Wales Hospital Group (January 1976 – January 1984) | 32 men (51 ± 15 years)<br>24 women (45 ± 21 years) | <ul style="list-style-type: none"> <li>Heart murmur + two positive blood cultures</li> <li>Pathological documentation + evidence of infection (pyrexia, embolism, immune complexes)</li> </ul>                                                                                                                                                                                                                                      | <ul style="list-style-type: none"> <li>Exclusion of patients with HD antecedents</li> <li>No exclusion of patients with previous dental work</li> <li>Posterior analysis of IDUs</li> </ul> | Inpatients undergoing echocardiography                                                           | Leaflet displacement ≥2mm or pansystolic posterior displacement ≥ 3mm with mitral leaflet echoes            |
| <b>Strom, 1998</b>    | Delaware Valley Case-Control Network (August 1988 – November 1990)            | Sex: N/A<br>Mean age: 59.1 ± 17.1 years            | <ul style="list-style-type: none"> <li>Clinical judgment per review of medical records</li> </ul>                                                                                                                                                                                                                                                                                                                                   | No exclusion of patients with HD antecedents, patients with previous dental work or IDUs                                                                                                    | Community control using the Waksberg random-digit dialing method                                 | N/A (interview)                                                                                             |

CHF – congestive heart failure; ESR – Erythrocyte Sedimentation Rate; HD – heart disease; IDUs – intravenous drug users; IE – infective endocarditis; MVP – mitral valve prolapse

**Supplementary material 3 - Main characteristics of the included cohort studies**

| Author, year       | Demographic data                                                 | Characteristics of MVP cohort                                                   | MVP criteria                       | Characteristics of IE cases               | IE criteria            | Confounding factors for IE                                                               |
|--------------------|------------------------------------------------------------------|---------------------------------------------------------------------------------|------------------------------------|-------------------------------------------|------------------------|------------------------------------------------------------------------------------------|
| <b>Katan, 2016</b> | Olmsted County residents with MVP (January 1989 – December 1998) | 331 men, 565 women<br>Mean age: 53 ± 21 years<br>Follow-up period: 11 ± 5 years | Systolic leaflet displacement ≥2mm | 3 men, 5 women<br>Mean age: 62 ± 22 years | Modified Duke criteria | No exclusion of patients with HD antecedents, patients with previous dental work or IDUs |

*HD – heart disease; IDUs – intravenous drug users; IE – infective endocarditis; MVP – mitral valve prolapse*

## Supplementary material 4 – Risk of Bias assessment

| Newcastle –<br>Ottawa Scale | Selection |          |          |          | Comparability | Exposure / Outcome |          |          | Total    |
|-----------------------------|-----------|----------|----------|----------|---------------|--------------------|----------|----------|----------|
|                             | 1         | 2        | 3        | 4        | 1             | 1                  | 2        | 3        |          |
| <b>Clemens, 1982</b>        | <b>0</b>  | <b>1</b> | <b>0</b> | <b>1</b> | <b>1</b>      | <b>1</b>           | <b>1</b> | <b>1</b> | <b>6</b> |
| <b>Danchin, 1989</b>        | <b>1</b>  | <b>1</b> | <b>1</b> | <b>1</b> | <b>1</b>      | <b>1</b>           | <b>1</b> | <b>1</b> | <b>8</b> |
| <b>Devereux, 1986</b>       | <b>1</b>  | <b>1</b> | <b>1</b> | <b>1</b> | <b>1</b>      | <b>1</b>           | <b>1</b> | <b>1</b> | <b>8</b> |
| <b>Katan, 2016</b>          | <b>1</b>  | <b>1</b> | <b>1</b> | <b>1</b> | <b>2</b>      | <b>0</b>           | <b>1</b> | <b>1</b> | <b>8</b> |
| <b>Hickey, 1985</b>         | <b>1</b>  | <b>1</b> | <b>0</b> | <b>1</b> | <b>1</b>      | <b>1</b>           | <b>1</b> | <b>1</b> | <b>7</b> |
| <b>Strom, 1998</b>          | <b>0</b>  | <b>1</b> | <b>1</b> | <b>1</b> | <b>2</b>      | <b>0</b>           | <b>1</b> | <b>0</b> | <b>6</b> |

**NEWCASTLE - OTTAWA QUALITY ASSESSMENT SCALE: CASE CONTROL STUDIES**

Selection:

- 1) Case definition adequate: 1 point if IE diagnosis confirmed with echocardiographic or pathologic findings; 0 points if only based on medical records
- 2) Representativeness of the cases: 1 point if representative case series; 0 if potential for selection bias
- 3) Selection of controls: 1 point if community controls; 0 points if hospital controls or no description
- 4) Definition of controls: 1 point if no history of IE

Comparability: 1 point if study adjusted for age and sex; 1 more point if study adjusted for any other important risk factors

Exposure:

- 1) Ascertainment of exposure: 1 point if validation of MVP with echocardiography based on current criteria; 0 points if medical record only or self report
- 2) Same method of ascertainment for cases and controls: 1 point if yes
- 3) Non-response rate: 1 point if same rate for both groups

**NEWCASTLE - OTTAWA QUALITY ASSESSMENT SCALE: COHORT STUDIES**

Selection:

- 1) Representativeness of exposed cohort: 1 point if study population truly or somewhat representative of a community/population-based study; 0 if study population was sampled from a special population or not described
- 2) Selection of non-exposed cohort: 1 point if drawn from the same community as the exposed cohort; 0 if different community or not described
- 3) Ascertainment of exposure: 1 point if validation of MVP with echocardiography based on current criteria
- 4) Demonstration that outcome was not present at start of study: 1 point if IE diagnosis followed the MVP diagnosis

Comparability: 1 point if study adjusted for age and sex; 1 more point if study adjusted for any other important risk factors

Outcome:

- 1) Assessment of outcome: 1 point if IE diagnosis confirmed by echocardiographic or pathologic findings; 0 if only based on medical

**Supplementary material 5 – Forest plot for NOS subgroups**

Considering the risk of bias, an analysis based on the NOS scale was conducted. When comparing studies with NOS ≤ 7 (OR 8.09, 95% CI 3.98, 19.91; I2 = 37.18%) and NOS > 7 (OR 7.12, 95% CI 3.98, 12.73; I2 = 0%), there was a small difference on the values obtained, as seen below.

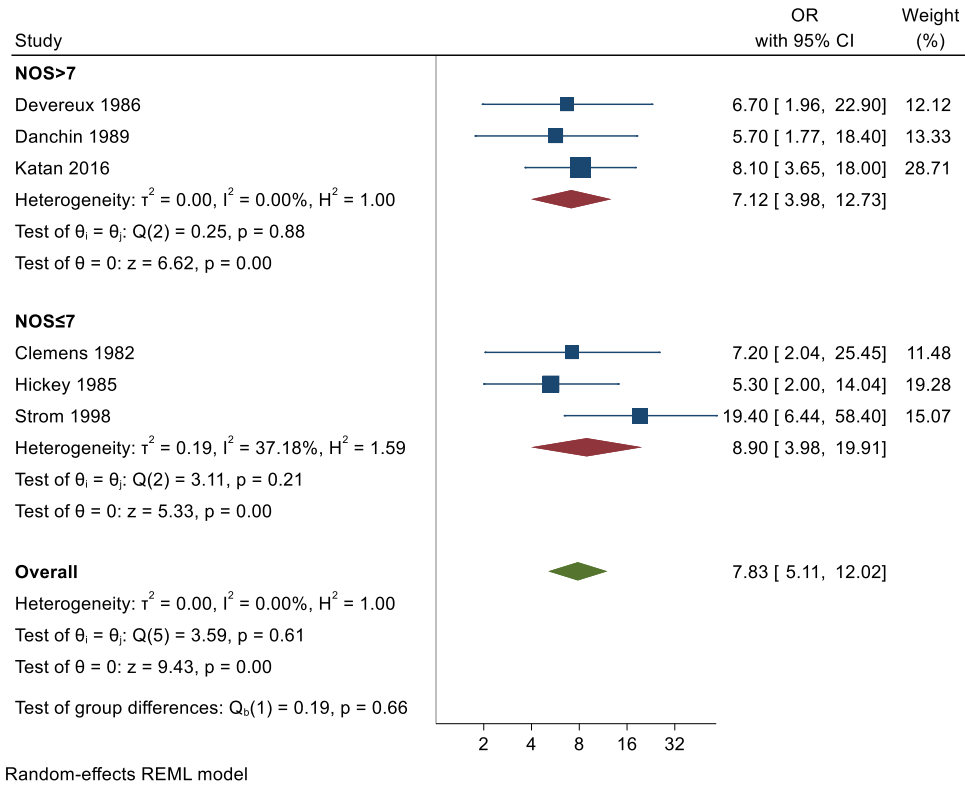

Forest plot with odds ratio and 95% CI for the studies with a NOS > 7 and for the studies with a NOS ≤ 7.

**Supplementary material 6 – Forest plot for study design subgroups**

An analysis was conducted to see possible differences regarding the study design. Both the case control (OR 7.73, 95% CI 4.66, 12.83; I2 = 0%) and the cohort (OR 8.10, 95% CI 3.65, 18.00; I2 = 0%) subgroups obtained a similar OR, as can be seen below.

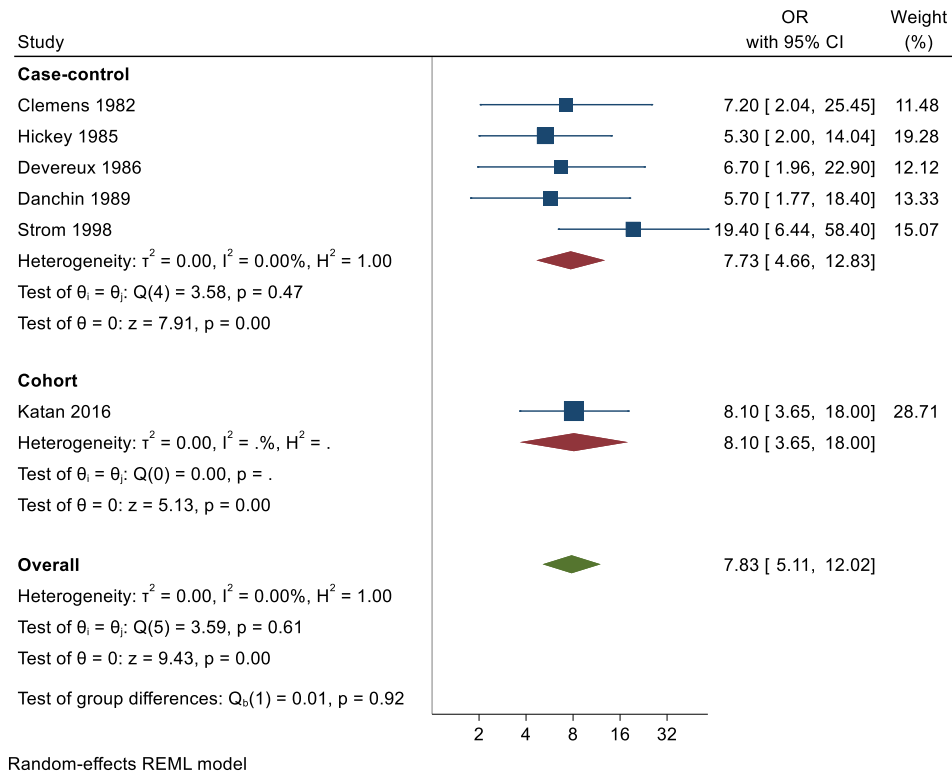

Forest plot with odds ratio and 95% CI for the case-control studies and the cohort study



### Supplementary material 7 – Sensitivity analysis

Sensitivity analysis revealed that no studies were causing significant changes in the obtained OR. Regarding the studies with a higher risk of bias, analysis excluding Clemens et. al, revealed an OR 7.92 (95% CI 5.03, 12.48), similar to the values obtained in the overall analysis; however, exclusion of Strom et. al revealed an OR 6.67 (95% CI 4.19, 10.61), slightly inferior to the value obtained.

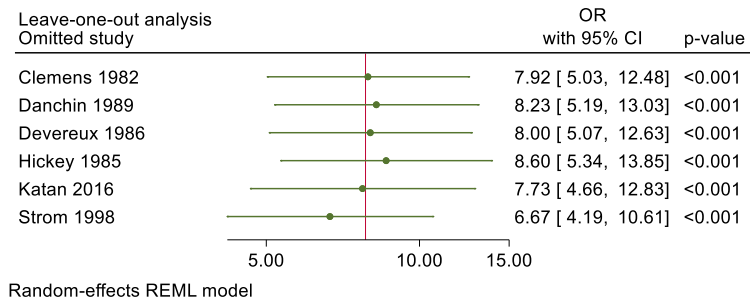

Forest plot with odds ratios and 95% CI obtained in the sensitivity analysis (leave-one-out analysis)

### Supplementary material 8 - Publication bias

The funnel plot and the Egger test results ( $p=0.99$ ) do not support publication bias.

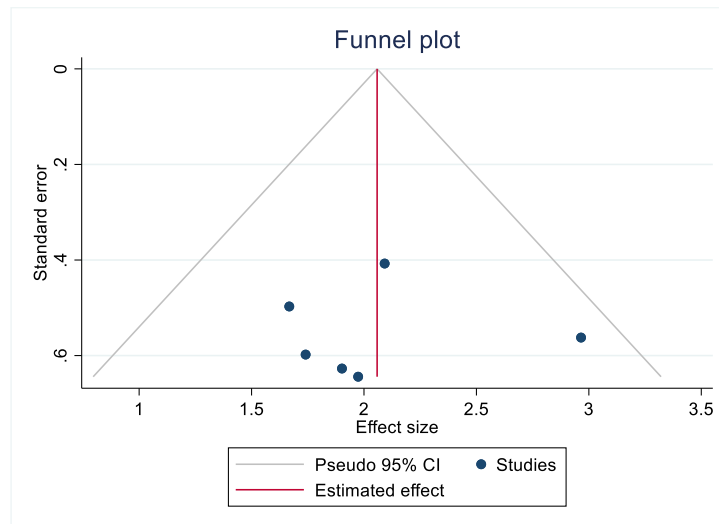

Funnel plot of the publication bias analysis
